# Supplementary material
Source: PubMed Central journal article supplement (PMC3422619)
Supplement: NIHMS315520-supplement-Supp_Table_S1.pdf [file NIHMS315520-supplement-Supp_Table_S1.pdf]

| Gene symbol | Fold change |
|-------------|-------------|
| Abcc1       | 1/2.8       |
| Abcc9       | 1/2.8       |
| Abhd2       | 1/2.8       |
| Abhd7       | 1/2.1       |
| Ablim1      | 1/2.3       |
| Accn4       | 1/2.6       |
| Adora1      | 1/2.4       |
| Adra1a      | 1/2.9       |
| Agtppb1     | 1/2.3       |
| Aloxe3      | 1/2.2       |
| Ap3b2       | 1/2.1       |
| Apobec2     | 1/3.5       |
| Arfgef2     | 1/2.1       |
| Arhgap11a   | 1/2.8       |
| Art1        | 1/2.2       |
| Art5        | 1/3.3       |
| Atf3        | 1/2.2       |
| Aurka       | 1/2.1       |
| B3gat1      | 1/2.0       |
| B3gnt5      | 1/3.1       |
| B4galt5     | 1/2.3       |
| Bace2       | 1/2.7       |
| Bex2        | 1/2.1       |
| Bpgm        | 1/2.2       |
| Bruno16     | 1/2.7       |
| C2cd2l      | 1/2.4       |
| Cabp5       | 1/3.3       |
| Calm3       | 1/2.4       |
| Camk4       | 1/2.2       |
| Camkk1      | 1/3.1       |
| Carhsp1     | 1/2.1       |
| Casp7       | 1/2.7       |
| Cbx1        | 1/2.3       |
| Ccdc126     | 1/2.0       |
| Ccndbp1     | 1/2.2       |
| Cdc216      | 1/2.2       |
| Cds1        | 1/3.2       |
| Ceacam20    | 1/2.4       |
| Chrna3      | 1/2.6       |
| Chrna7      | 1/3.1       |
| Chrn4       | 1/2.3       |
| Cited1      | 1/2.4       |
| Ckap2       | 1/2.4       |
| Ckmt1       | 1/3.3       |
| Clca3       | 1/3.8       |
| Cldn22      | 1/2.1       |
| Clstn3      | 1/2.2       |
| Cnrip1      | 1/2.2       |
| Cntf        | 1/2.2       |
| Col7a1      | 1/3.6       |

| Gene symbol | Fold change |
|-------------|-------------|
| Cpa2        | 1/2.2       |
| Cplx2       | 1/2.4       |
| Crbn        | 1/2.2       |
| Creml       | 1/2.8       |
| Ctsb        | 1/2.0       |
| Cxx1c       | 1/2.2       |
| Cyp1a1      | 1/3.6       |
| Dbn1d1      | 1/3.2       |
| Dcl1        | 1/2.9       |
| Ddah1       | 1/2.9       |
| Depdc7      | 1/3.3       |
| Disp2       | 1/2.0       |
| Dlc1        | 1/2.1       |
| Dmkn        | 1/2.3       |
| Dnajc12     | 1/2.0       |
| Dner        | 1/2.5       |
| Dohh        | 1/3.5       |
| Dpp10       | 1/2.3       |
| Dpp4        | 1/2.2       |
| Dpysl5      | 1/2.2       |
| Drd1a       | 1/3.0       |
| Dusp14      | 1/2.9       |
| E2f1        | 1/2.2       |
| E2f8        | 1/3.1       |
| Edil3       | 1/2.5       |
| Ednrb       | 1/2.2       |
| Egflam      | 1/2.2       |
| Eif1a       | 1/2.2       |
| Eno2        | 1/3.2       |
| Enpp6       | 1/2.5       |
| Epha10      | 1/2.9       |
| Ephx4       | 1/2.1       |
| Eps8        | 1/2.3       |
| Evi2a       | 1/3.6       |
| F2r         | 1/3.4       |
| Fat3        | 1/3.5       |
| Fbln5       | 1/2.6       |
| Fbx12       | 1/2.2       |
| Fbxo44      | 1/2.5       |
| Flvcr2      | 1/2.5       |
| Frm1d1      | 1/3.6       |
| Fscn1       | 1/2.0       |
| Fut4        | 1/2.4       |
| Gabarapl1   | 1/2.4       |
| Galnt9      | 1/2.0       |
| Gchfr       | 1/2.1       |
| Gckr        | 1/3.7       |
| Gdap1       | 1/2.1       |
| Gfer        | 1/2.3       |
| Gla         | 1/2.2       |

| Gene symbol | Fold change |
|-------------|-------------|
| Gls2        | 1/2.0       |
| Gm239       | 1/2.6       |
| Gnat2       | 1/2.8       |
| Gnb5        | 1/2.2       |
| Gpr132      | 1/2.5       |
| Gpr137c     | 1/2.2       |
| Gpr143      | 1/3.4       |
| Gpr19       | 1/2.4       |
| Gpsm3       | 1/2.2       |
| Grtp1       | 1/2.2       |
| Gucyl1b3    | 1/2.4       |
| Gzmm        | 1/2.0       |
| Hand1       | 1/2.4       |
| Hap1        | 1/2.2       |
| Hapln4      | 1/2.7       |
| Hcn3        | 1/2.6       |
| Hdhd3       | 1/4.0       |
| Hebp2       | 1/2.0       |
| Hisppd2a    | 1/3.3       |
| Hmgn1       | 1/3.0       |
| Htatip2     | 1/2.1       |
| Htr3a       | 1/2.1       |
| Iah1        | 1/2.3       |
| Icmt        | 1/2.0       |
| Ifng        | 1/3.4       |
| Igf1r       | 1/2.5       |
| Igh-6       | 1/2.4       |
| Il7         | 1/2.1       |
| Jam2        | 1/3.4       |
| Kcnab2      | 1/2.1       |
| Kcnc1       | 1/2.1       |
| Kcnk3       | 1/2.3       |
| Kcnq4       | 1/3.5       |
| Kif1a       | 1/3.5       |
| Kiss1r      | 1/3.8       |
| Kpna6       | 1/2.0       |
| Kremen1     | 1/2.3       |
| Krt24       | 1/2.1       |
| Lhfp13      | 1/2.5       |
| Lpl         | 1/2.7       |
| Lrat        | 1/2.4       |
| Lrfn2       | 1/3.2       |
| Lrit2       | 1/2.3       |
| Lrrc2       | 1/3.6       |
| Lrrc24      | 1/2.4       |
| Lrrc27      | 1/2.8       |
| Lrrip2      | 1/2.2       |
| Lrrtm2      | 1/2.1       |
| Lypd6       | 1/4.0       |
| Mdm1        | 1/3.7       |

| Gene symbol | Fold change |
|-------------|-------------|
| Mlph        | 1/2.1       |
| Mrpl49      | 1/2.8       |
| Mt1         | 1/2.1       |
| Mt2         | 1/3.7       |
| Mttr14      | 1/2.6       |
| Naip2       | 1/2.1       |
| Naip5       | 1/2.6       |
| Ncoa3       | 1/2.1       |
| Neurl       | 1/3.8       |
| Nhlrc2      | 1/2.6       |
| Npb         | 1/2.9       |
| Nptx1       | 1/2.2       |
| Nrn1l       | 1/2.7       |
| Nrxn3       | 1/2.1       |
| Nsd1        | 1/2.2       |
| Nsf         | 1/2.9       |
| Nxn1l       | 1/3.4       |
| Obfc1       | 1/2.7       |
| Optn        | 1/2.0       |
| Osbp2       | 1/3.1       |
| Otop3       | 1/3.7       |
| P2rx5       | 1/2.4       |
| Pak3        | 1/2.9       |
| Pbx2        | 1/2.3       |
| Pcdh15      | 1/2.1       |
| Pde1c       | 1/2.2       |
| Pde7b       | 1/2.1       |
| Pde8b       | 1/3.6       |
| Pdlim7      | 1/2.4       |
| Phyhip1     | 1/2.1       |
| Pi4k2b      | 1/3.1       |
| Pitpnm3     | 1/2.8       |
| Pmvk        | 1/2.2       |
| Pnpo        | 1/2.0       |
| Pole3       | 1/2.3       |
| Pols        | 1/2.5       |
| pparda      | 1/3.1       |
| Pparg       | 1/3.2       |
| Ppp1r3c     | 1/2.4       |
| Prc1        | 1/2.5       |
| Prima1      | 1/2.9       |
| Prmt8       | 1/2.9       |
| Prnpip1     | 1/2.4       |
| Prr1l       | 1/2.1       |
| Psat1       | 1/3.4       |
| Pscd1       | 1/3.1       |
| Ptprn       | 1/2.9       |
| Ptptr       | 1/2.5       |
| Qdpr        | 1/2.0       |
| Rabepk      | 1/2.3       |

| Gene symbol | Fold change |
|-------------|-------------|
| Rapgef5     | 1/2.4       |
| Rasl11b     | 1/2.1       |
| Rbpj        | 1/3.2       |
| Rbpms2      | 1/3.4       |
| Rcor3       | 1/2.4       |
| Rdh9        | 1/2.0       |
| Rgag4       | 1/2.2       |
| Ric3        | 1/2.2       |
| Rims3       | 1/2.3       |
| Ripply2     | 1/2.1       |
| Rlbp111     | 1/2.5       |
| Rnf13       | 1/3.4       |
| Rnf165      | 1/2.6       |
| Rom1        | 1/2.7       |
| Rraga       | 1/2.2       |
| Runx1       | 1/2.1       |
| Rwdd4a      | 1/2.4       |
| S100a1      | 1/2.1       |
| Scamp1      | 1/2.7       |
| Scg2        | 1/3.6       |
| Scgn        | 1/3.0       |
| Sec14l1     | 1/2.1       |
| Sgip1       | 1/3.1       |
| Sh2d5       | 1/3.9       |
| Sin3b       | 1/2.1       |
| Slc11a1     | 1/2.1       |
| Slc12a1     | 1/2.1       |
| Slc25a22    | 1/3.2       |
| Slc25a35    | 1/2.8       |
| Slc27a3     | 1/2.0       |
| Slc29a2     | 1/2.1       |
| Slc34a1     | 1/2.7       |
| Slc6a6      | 1/2.2       |
| Slc6a7      | 1/2.1       |
| Slc6a9      | 1/2.3       |
| Slc7a5      | 1/2.5       |
| Slc9a5      | 1/2.3       |
| Slco1a5     | 1/3.9       |
| Smarcad1    | 1/2.0       |
| Snph        | 1/2.3       |
| Snx10       | 1/3.0       |
| Sorbs1      | 1/3.3       |
| Sorl1       | 1/2.7       |
| Sp6         | 1/2.2       |
| St8sia2     | 1/3.0       |
| Stard4      | 1/2.3       |
| Sult4a1     | 1/2.1       |
| Susd3       | 1/3.3       |
| Svop        | 1/2.6       |
| Syn2        | 1/3.2       |

| Gene symbol   | Fold change |
|---------------|-------------|
| Sync          | 1/2.1       |
| Syt1          | 1/2.6       |
| Syt2          | 1/2.8       |
| Saal1         | 1/3.3       |
| Tac4          | 1/3.1       |
| Tbc1d1        | 1/2.5       |
| Tbc1d30       | 1/2.1       |
| Tbx21         | 1/2.1       |
| Tc2n          | 1/3.5       |
| Tchh          | 1/2.0       |
| Terf2ip       | 1/2.1       |
| Tgoln1        | 1/2.6       |
| Tgoln2        | 1/2.6       |
| Tgs1          | 1/2.1       |
| Tmem144       | 1/2.8       |
| Tmem16k       | 1/2.5       |
| Tmem179       | 1/2.0       |
| Tmem202       | 1/2.5       |
| Tmem38b       | 1/2.1       |
| Traf1         | 1/2.0       |
| Traip         | 1/3.4       |
| Tspan10       | 1/2.2       |
| Ttc28         | 1/2.5       |
| Ttc39c        | 1/2.1       |
| Ttc9c         | 1/2.1       |
| Ttk           | 1/2.8       |
| Ttyh1         | 1/3.9       |
| Tulp1         | 1/2.9       |
| Ubl5          | 1/2.3       |
| Wfs1          | 1/3.4       |
| Wnk3          | 1/2.1       |
| Xylb          | 1/2.2       |
| Zdhhc2        | 1/2.7       |
| Zfp385b       | 1/2.5       |
| Zfp57         | 1/2.3       |
| Zwint         | 1/2.1       |
| A230051N06Rik | 1/2.2       |
| A530058N18Rik | 1/2.1       |
| A930009E05Rik | 1/2.0       |
| A930015G24Rik | 1/2.5       |
| A930018P22Rik | 1/2.7       |
| AK001237      | 1/2.5       |
| AK001541      | 1/2.5       |
| AK023186      | 1/3.1       |
| AK023913      | 1/3.6       |
| AK026212      | 1/3.0       |
| AK027103      | 1/2.4       |
| AK027355      | 1/2.7       |
| AK027376      | 1/2.8       |
| AK034059      | 1/3.6       |

| Gene symbol        | Fold change |
|--------------------|-------------|
| AK040987           | 1/2.5       |
| AK046467           | 1/3.9       |
| AK054820           | 1/2.0       |
| AK055773           | 1/2.0       |
| AK074540           | 1/2.1       |
| AK078237           | 1/2.8       |
| AK083645           | 1/3.6       |
| AK089148           | 1/2.3       |
| AK092479           | 1/2.2       |
| AK092994           | 1/2.2       |
| AK098487           | 1/2.6       |
| AK124123           | 1/3.4       |
| AK125044           | 1/3.0       |
| AK125328           | 1/3.3       |
| AK160303           | 1/2.3       |
| AK293833           | 1/2.4       |
| AK295431           | 1/2.1       |
| AK299620           | 1/3.8       |
| AK304130           | 1/2.5       |
| AK308405           | 1/2.5       |
| AU015791           | 1/2.5       |
| AW146242           | 1/2.8       |
| B130024G19Rik      | 1/3.0       |
| B230112C05Rik      | 1/3.7       |
| B230209C24Rik      | 1/3.1       |
| BC022687           | 1/2.3       |
| BC027072           | 1/2.2       |
| C030014L02         | 1/2.4       |
| C030027H14Rik      | 1/2.1       |
| D430041D05Rik      | 1/2.6       |
| D5Wsu178e          | 1/2.1       |
| EG215714           | 1/2.3       |
| EG245305           | 1/2.1       |
| EG545391           | 1/2.1       |
| ENSBTAT00000004057 | 1/2.5       |
| ENSBTAT00000036136 | 1/3.7       |
| ENSBTAT00000046515 | 1/2.9       |
| ENSCAFT00000027361 | 1/2.0       |
| ENSRNOT00000049631 | 1/2.8       |
| ENSRNOT00000061665 | 1/2.7       |
| ENST00000327506    | 1/2.9       |
| LOC100038890       | 1/2.6       |
| LOC100040766       | 1/2.9       |
| LOC100044755       | 1/3.5       |
| LOC100044875       | 1/2.5       |
| LOC100044882       | 1/3.1       |
| LOC100046112       | 1/2.1       |
| LOC100046261       | 1/3.1       |
| LOC100046558       | 1/3.4       |
| LOC100046959       | 1/2.5       |

| Gene symbol              | Fold change |
|--------------------------|-------------|
| LOC100047028             | 1/2.3       |
| LOC100047123             | 1/2.2       |
| LOC100047619             | 1/2.5       |
| LOC100047659             | 1/2.0       |
| LOC100047936             | 1/2.6       |
| LOC100048526             | 1/3.8       |
| LOC100048603             | 1/2.8       |
| LOC100048701             | 1/3.6       |
| LOC634286                | 1/3.6       |
| LOC669888                | 1/2.7       |
| LOC676389                | 1/2.6       |
| LOC720213*               | 1/2.9       |
| NM_001107532             | 1/2.1       |
| NM_174641                | 1/2.4       |
| NM_214172                | 1/2.2       |
| RIKEN full-length enrich | 1/4.0       |
| RIKEN full-length enrich | 1/3.9       |
| XM_001053355             | 1/2.2       |
| XM_001065204             | 1/2.9       |
| XM_001077059             | 1/2.6       |
| XM_001093939             | 1/3.0       |
| XM_001094160             | 1/3.0       |
| XM_001107577             | 1/2.3       |
| XM_001112105             | 1/2.2       |
| XM_001136882             | 1/2.5       |
| XM_001159895             | 1/2.1       |
| XM_001252145             | 1/2.8       |
| XM_001492566             | 1/3.3       |
| XM_037557                | 1/2.1       |
| XM_226742                | 1/2.1       |
| XM_342195                | 1/2.1       |
| XM_538776                | 1/2.3       |
| XM_549362                | 1/2.4       |
| XM_603816                | 1/3.7       |
| XM_844753                | 1/2.4       |
| XM_855529                | 1/2.1       |
| XM_862973                | 1/2.2       |
| XR_024632                | 1/3.0       |
| XR_044848                | 1/2.8       |
| 1110046J04Rik            | 1/2.9       |
| 1600002H07Rik            | 1/2.8       |
| 1700025G04Rik            | 1/2.0       |
| 1700049J03Rik            | 1/2.5       |
| 1700112E06Rik            | 1/3.5       |
| 2010002N04Rik            | 1/3.7       |
| 2010011I20Rik            | 1/3.6       |
| 2310026L22Rik            | 1/2.0       |
| 2410137M14Rik            | 1/2.4       |
| 2610100L16Rik            | 1/2.1       |
| 2810038L03Rik            | 1/2.1       |

| Gene symbol   | Fold change |
|---------------|-------------|
| 2810434M15Rik | 1/2.4       |
| 2900008C10Rik | 1/2.3       |
| 3110001A13Rik | 1/2.2       |
| 3110027N22Rik | 1/2.2       |
| 4631422O05Rik | 1/2.1       |
| 4832406H04Rik | 1/2.1       |
| 4930517J16Rik | 1/2.4       |
| 4930545L23Rik | 1/2.9       |
| 4931440B09Rik | 1/3.7       |
| 4933433P14Rik | 1/2.1       |
| 5730422E09Rik | 1/2.1       |
| 6330406I15Rik | 1/2.1       |
| 6430706D22Rik | 1/2.9       |
| 6720469N11Rik | 1/3.0       |
| 7530414M10Rik | 1/2.2       |
| 9330182L06Rik | 1/2.9       |
| 9430051O21Rik | 1/2.6       |
| 9530096D07Rik | 1/2.0       |
| 9630028H03Rik | 1/2.7       |
| 100040297     | 1/2.3       |
| 100040465     | 1/3.1       |
