# Supplementary material
Source: PubMed Central journal article supplement (PMC3422619)
Supplement: NIHMS315520-supplement-Supp_Table_S2.pdf [file NIHMS315520-supplement-Supp_Table_S2.pdf]

| Gene Symbol | Fold change |
|-------------|-------------|
| Abca8a      | 2.55        |
| Abcb1a      | 2.25        |
| Abcc4       | 2.01        |
| Abi3bp      | 2.07        |
| Acpl2       | 2.60        |
| Acsbg1      | 2.11        |
| Actg2       | 2.36        |
| Adam11      | 2.41        |
| Adam12      | 2.41        |
| Adam23      | 2.83        |
| Adamts12    | 2.25        |
| Adamts2     | 2.11        |
| Adamts9     | 2.16        |
| Adcy5       | 2.01        |
| Adra2a      | 2.20        |
| Afap111     | 2.20        |
| Ahnak2      | 2.04        |
| Aifm3       | 2.33        |
| Alcam       | 2.08        |
| Aldh1a2     | 3.51        |
| Ankrd43     | 2.57        |
| Anks1b      | 2.43        |
| Anpep       | 2.45        |
| Anxa3       | 2.03        |
| Apcdd1      | 2.04        |
| Aplnr       | 2.03        |
| Aqp4        | 2.14        |
| Arhgap20    | 2.17        |
| Arhgef7     | 2.01        |
| Arnt2       | 2.25        |
| Asgr1       | 2.45        |
| Aspa        | 2.45        |
| Atp1a2      | 2.83        |
| Baiap3      | 2.25        |
| Barx2       | 2.28        |
| Bcan        | 3.56        |
| Bex1        | 2.08        |
| Bicc1       | 2.08        |
| Bmp5        | 2.04        |
| Bmper       | 2.33        |
| Bnc2        | 2.46        |
| Boc         | 2.06        |
| Brsk1       | 2.31        |
| Btbd11      | 2.03        |
| Btla        | 2.25        |
| C1ql2       | 3.32        |
| C1qtnf7     | 2.11        |
| C2          | 2.66        |
| Cacna1a     | 2.17        |
| Cacna2d1    | 2.51        |

| Gene Symbol | Fold change |
|-------------|-------------|
| Cadps       | 3.76        |
| Cadps2      | 2.45        |
| Calb1       | 3.68        |
| Calb2       | 2.57        |
| Camk2a      | 3.34        |
| Cand2       | 2.13        |
| Car10       | 2.62        |
| Card14      | 2.35        |
| Cbr3        | 2.03        |
| Ccbe1       | 2.20        |
| Ccdc80      | 2.10        |
| Cckbr       | 2.64        |
| Cd248       | 2.71        |
| Cdgap       | 2.38        |
| Cdh1        | 2.87        |
| Cdk5r2      | 2.85        |
| Cdo1        | 2.22        |
| Cercam      | 2.16        |
| Ces7        | 2.33        |
| Cfi         | 2.27        |
| Chac1       | 3.05        |
| Chad        | 2.57        |
| Chl1        | 2.97        |
| Chn2        | 2.60        |
| Chrna6      | 2.85        |
| Chst1       | 2.45        |
| Cldn11      | 2.06        |
| Clip3       | 2.06        |
| Cmklr1      | 2.03        |
| Cnih2       | 2.17        |
| Cnksr2      | 2.17        |
| Cnpy1       | 3.92        |
| Cntfr       | 2.16        |
| Cntnap4     | 2.13        |
| Coch        | 2.33        |
| Col11a1     | 2.04        |
| Col12a1     | 2.04        |
| Col14a1     | 2.85        |
| Col15a1     | 2.04        |
| Col16a1     | 2.27        |
| Col18a1     | 2.27        |
| Col25a1     | 2.87        |
| Col3a1      | 2.51        |
| Col4a1      | 2.27        |
| Col5a1      | 2.22        |
| Col5a2      | 2.83        |
| Col6a1      | 2.48        |
| Col6a2      | 2.73        |
| Col6a3      | 3.16        |
| Colec12     | 2.04        |

| Gene Symbol | Fold change |
|-------------|-------------|
| Copz2       | 2.31        |
| Cox4i2      | 2.20        |
| Cox8b       | 2.71        |
| Crabp2      | 2.68        |
| Crim2       | 2.53        |
| Csn3        | 2.51        |
| Cts6        | 2.62        |
| Ctxn1       | 2.08        |
| Cugbp2      | 2.31        |
| Cyp1b1      | 2.53        |
| Cyp2f2      | 2.95        |
| Cyp2j9      | 2.35        |
| Cyp4v3      | 2.10        |
| Dcc         | 2.04        |
| Ddhd1       | 2.04        |
| Ddn         | 3.27        |
| Dgka        | 2.11        |
| Dlgap1      | 2.14        |
| Dlx2        | 2.10        |
| Dmp1        | 2.01        |
| Dmpk        | 2.03        |
| Dnahc6      | 2.41        |
| Dock3       | 2.55        |
| Dock5       | 2.27        |
| Drp2        | 2.03        |
| Dsp         | 2.11        |
| Dusp15      | 2.27        |
| Dynlrb2     | 2.16        |
| Dzip1       | 2.01        |
| Daam2       | 2.14        |
| Efhd1       | 2.45        |
| Egfl8       | 2.04        |
| Egfr        | 2.23        |
| Egln3       | 2.13        |
| Egr3        | 2.50        |
| Eln         | 2.04        |
| Elov1l      | 2.13        |
| Emid2       | 2.39        |
| Eml1        | 2.57        |
| Enc1        | 2.30        |
| Enpp1       | 2.07        |
| Eppk1       | 2.10        |
| Ermap       | 2.04        |
| Eya1        | 2.04        |
| Eya2        | 2.23        |
| Fbln7       | 2.10        |
| Fbn1        | 2.04        |
| Fbxl7       | 2.03        |
| Fhl2        | 2.39        |
| Fkbp1b      | 2.35        |

| Gene Symbol | Fold change |
|-------------|-------------|
| Fn1         | 2.07        |
| Foxc1       | 2.35        |
| Foxd1       | 2.27        |
| Foxd2       | 2.08        |
| Foxp2       | 2.28        |
| Foxred2     | 2.19        |
| Frmf3       | 2.20        |
| Frzb        | 3.89        |
| Fst         | 2.25        |
| Fstl5       | 3.89        |
| Gabrb2      | 2.95        |
| Gabbr2      | 3.92        |
| Galnt13     | 2.45        |
| Garnl4      | 3.46        |
| Gas7        | 2.06        |
| Gbp2        | 2.33        |
| Gfap        | 2.43        |
| Gfod1       | 2.57        |
| Gfra2       | 2.50        |
| Gfra3       | 2.48        |
| Gjb2        | 2.38        |
| Gjb6        | 2.69        |
| Gli3        | 2.50        |
| Glis2       | 2.08        |
| Gm484       | 2.53        |
| Gng13       | 3.32        |
| Gng3        | 3.23        |
| Gp1bb       | 2.06        |
| Gpr124      | 2.03        |
| Gpr37l1     | 2.06        |
| Gpr68       | 2.23        |
| Gpr85       | 2.03        |
| Gprin3      | 2.69        |
| Gria3       | 2.19        |
| Grin2d      | 2.79        |
| Grin3a      | 2.19        |
| Grm7        | 3.48        |
| Gsbs        | 3.86        |
| Gsg1l       | 3.68        |
| Gsto1       | 2.33        |
| Gypc        | 2.14        |
| H19         | 2.25        |
| Hdac9       | 2.14        |
| Hes5        | 2.07        |
| Heyl        | 2.27        |
| Hic1        | 2.27        |
| Hist3h2ba   | 2.50        |
| Hmgcs2      | 3.07        |
| Hoxc5       | 2.04        |
| Hpcal4      | 2.79        |

| Gene Symbol | Fold change |
|-------------|-------------|
| Hpgd        | 2.17        |
| Hsd17b11    | 2.22        |
| Htr1d       | 2.01        |
| Htra3       | 3.16        |
| Ifih1       | 2.11        |
| Igh-6       | 2.19        |
| Igl-V1      | 2.08        |
| Igsf1       | 2.08        |
| Igsf3       | 2.13        |
| Ihpk2       | 2.11        |
| Il12rb2     | 2.19        |
| Il33        | 2.27        |
| Impg1       | 3.07        |
| Inmt        | 2.03        |
| Intu        | 2.08        |
| Ipw         | 2.43        |
| Iqub        | 2.01        |
| Irx1        | 3.76        |
| ISL1        | 3.53        |
| Islr        | 2.13        |
| Itga1       | 2.25        |
| Itga4       | 2.19        |
| Itga8       | 2.08        |
| Itgb1       | 2.91        |
| Itih5       | 2.30        |
| Jph1        | 2.03        |
| Kank4       | 2.66        |
| Kcna1       | 2.07        |
| Kcna6       | 2.36        |
| Kcnc2       | 2.48        |
| Kcnc4       | 2.13        |
| Kcnj10      | 2.57        |
| Kcnj16      | 2.31        |
| Kcnk5       | 2.36        |
| Kcnq5       | 2.25        |
| Kcnt1       | 2.75        |
| Kdr         | 2.01        |
| Kif5a       | 2.62        |
| KLK13       | 2.19        |
| Klra17      | 2.11        |
| Krt73       | 2.17        |
| L1cam       | 2.28        |
| Lama4       | 2.11        |
| Lcn2        | 2.17        |
| Ldhb        | 2.07        |
| Ldlrad3     | 2.30        |
| Lect1       | 2.19        |
| Lgi4        | 2.01        |
| Lhx1        | 2.14        |
| Lmo4        | 2.04        |

| Gene Symbol | Fold change |
|-------------|-------------|
| Lonrf3      | 2.50        |
| Lox         | 2.22        |
| Lpar1       | 2.43        |
| Lphn2       | 2.99        |
| Lphn3       | 2.13        |
| Lrrn3       | 2.66        |
| Lrrtm1      | 3.07        |
| Lsamp       | 2.48        |
| Lysmd2      | 2.31        |
| Mal2        | 2.79        |
| Masp1       | 2.23        |
| Mbp         | 3.14        |
| mCG_21548   | 2.14        |
| Met         | 2.04        |
| Mfap3l      | 2.06        |
| Mfap5       | 2.19        |
| Mkx         | 2.08        |
| Mmrn1       | 2.48        |
| Mobkl2b     | 2.14        |
| Mobp        | 2.08        |
| Morn1       | 3.14        |
| Mpz         | 2.58        |
| Mpzl2       | 2.30        |
| Mrap        | 2.07        |
| Mrc2        | 2.11        |
| Mrgprf      | 2.81        |
| Mrvi1       | 2.08        |
| Myb         | 2.14        |
| Myocd       | 2.11        |
| Myp0        | 2.58        |
| Myt1l       | 3.43        |
| Ncan        | 2.45        |
| Nell2       | 2.93        |
| Neu2        | 2.62        |
| Ngp         | 2.35        |
| Nid1        | 2.20        |
| Nkain1      | 2.58        |
| Nkain2      | 2.07        |
| Nnmt        | 2.17        |
| Nol4        | 2.41        |
| Nos1ap      | 3.25        |
| Nov         | 2.06        |
| Npas3       | 2.01        |
| Nppc        | 2.85        |
| Nptx2       | 2.27        |
| Nr2f1       | 2.66        |
| Nrg1        | 2.97        |
| Nrxn1       | 2.16        |
| Ntng1       | 2.91        |
| Ntrk2       | 2.36        |

| Gene Symbol | Fold change |
|-------------|-------------|
| Nts         | 3.20        |
| Ntsr1       | 2.99        |
| Nxph1       | 2.51        |
| Nxph4       | 2.36        |
| Naalad2     | 2.14        |
| Oasl2       | 2.10        |
| Odz4        | 2.58        |
| Olfm3       | 2.36        |
| Omd         | 2.46        |
| Gm15698     | 2.20        |
| Gm12824     | 2.79        |
| P2ry14      | 2.16        |
| Pard6g      | 2.04        |
| Pcdh7       | 2.66        |
| Pcdh8       | 3.68        |
| Pcdh9       | 3.48        |
| Pcdhb10     | 2.07        |
| Pcdhb17     | 2.08        |
| Pcdhb3      | 2.58        |
| Pclo        | 2.06        |
| Pcsk5       | 3.05        |
| Pdgfrl      | 2.22        |
| Pdzrn3      | 2.87        |
| Pear1       | 2.07        |
| Peg10       | 2.35        |
| Per3        | 2.75        |
| Pla2g4a     | 2.07        |
| Plekhg2     | 2.10        |
| Plp1        | 2.39        |
| Plxdc2      | 2.23        |
| Plxna2      | 2.03        |
| Pnp1        | 2.19        |
| Pou3f3      | 3.23        |
| Ppic        | 2.19        |
| Pram1       | 2.08        |
| Prdm6       | 2.35        |
| Prei4       | 2.06        |
| Prkg2       | 2.55        |
| Prokr1      | 2.62        |
| Prrx1       | 2.20        |
| Prrx2       | 2.04        |
| Ptch2       | 2.20        |
| Ptchd1      | 2.87        |
| Ptger2      | 2.04        |
| Ptpn14      | 2.07        |
| Ptprd       | 2.55        |
| Pvr13       | 2.04        |
| Rab6b       | 2.53        |
| Ranbp3l     | 3.05        |
| Rap1gap     | 2.23        |

| Gene Symbol | Fold change |
|-------------|-------------|
| Rasl10a     | 2.06        |
| Reln        | 2.36        |
| Reps2       | 2.91        |
| Rerg        | 2.13        |
| Rgs16       | 3.58        |
| Rgs4        | 2.31        |
| Rgs8        | 2.25        |
| Rimbp2      | 3.94        |
| Rit2        | 2.28        |
| Rncr2       | 2.50        |
| Rnf144a     | 2.19        |
| Robo1       | 2.57        |
| Rprm        | 2.20        |
| Rspo1       | 2.10        |
| Ryr3        | 2.14        |
| S100a8      | 2.99        |
| S100a9      | 2.50        |
| S100b       | 2.19        |
| S1pr3       | 2.38        |
| Scara3      | 2.73        |
| Scn1b       | 2.10        |
| Scn2a1      | 2.01        |
| Scn3a       | 2.16        |
| Scn7a       | 2.13        |
| Scrn1       | 2.22        |
| Sema3a      | 3.89        |
| Sema3d      | 2.14        |
| Sept11      | 2.07        |
| Sept3       | 2.23        |
| Serpib6b    | 2.41        |
| Serpib6c    | 2.30        |
| Serpig1     | 2.16        |
| Sfrp4       | 2.33        |
| Sfrp5       | 2.50        |
| Shisa3      | 2.33        |
| Six1        | 2.01        |
| Slc13a3     | 2.06        |
| Slc15a1     | 2.16        |
| Slc15a2     | 2.87        |
| Slc16a11    | 3.03        |
| Slc16a13    | 2.22        |
| Slc1a3      | 2.66        |
| Slc22a23    | 2.28        |
| Slc22a6     | 2.55        |
| Slc22a8     | 3.25        |
| Slc24a3     | 2.17        |
| Slc2a3      | 2.01        |
| Slc30a10    | 2.08        |
| Slc38a2     | 2.16        |
| Slc47a1     | 2.36        |

| Gene Symbol | Fold change |
|-------------|-------------|
| Slc6a13     | 2.03        |
| Slc7a11     | 2.22        |
| Slc7a14     | 3.01        |
| Slc9a2      | 2.03        |
| Smarca1     | 2.08        |
| Smoc2       | 2.10        |
| Snca        | 2.11        |
| Sox10       | 2.91        |
| Spock3      | 2.25        |
| Sqrdl       | 2.13        |
| Sst         | 2.95        |
| St6galnac1  | 2.04        |
| Stra6       | 2.11        |
| Synpo2      | 2.77        |
| Syt12       | 2.20        |
| Tanc1       | 2.03        |
| Tbr1        | 2.28        |
| Tbx18       | 2.01        |
| Tbx3        | 3.14        |
| Tcerg11     | 2.64        |
| Tcfcp211    | 2.19        |
| Tfpi        | 2.22        |
| Tfpi2       | 3.14        |
| Tgfb1i1     | 2.04        |
| Thbs2       | 2.07        |
| Thsd4       | 2.07        |
| Thy1        | 2.36        |
| Tlr1        | 3.10        |
| Tmem119     | 2.06        |
| Tmem130     | 2.79        |
| Tmem151b    | 2.07        |
| Tmem164     | 2.14        |
| Tmem30b     | 2.16        |
| Tmem30b     | 2.16        |
| Tmod2       | 2.31        |
| Tnfaip2     | 2.13        |
| Tox3        | 2.75        |
| Trhde       | 3.36        |
| Trip6       | 2.62        |
| Trp53i11    | 2.01        |
| Tshz3       | 2.08        |
| Tspan8      | 3.25        |
| Tuba4a      | 2.08        |
| Tubb4       | 2.41        |
| Twist1      | 2.22        |
| Twist2      | 2.41        |
| Unc13c      | 2.50        |
| Unc5c       | 2.16        |
| Upk1b       | 3.23        |
| Uroc1       | 2.75        |

| Gene Symbol | Fold change |
|-------------|-------------|
| Usp29       | 2.41        |
| Ust         | 2.13        |
| Vash2       | 2.28        |
| Vcan        | 2.68        |
| Vegfc       | 2.01        |
| Vsnl1       | 3.07        |
| Vstm2a      | 2.22        |
| Wnk4        | 2.33        |
| Wnt10a      | 2.85        |
| Wnt4        | 2.64        |
| Wnt6        | 2.03        |
| Ypel4       | 2.48        |
| Zcchc12     | 2.01        |
| Zfhx2as     | 2.11        |
| Zfp467      | 2.16        |
| Zfpm2       | 2.43        |
| Zic3        | 3.12        |
| Zmat4       | 2.73        |
| Aard        | 2.22        |
| AK140299    | 2.57        |
| AI854517    | 2.04        |
| AW125753    | 3.03        |
| AK019785    | 3.53        |
| AK022603    | 2.11        |
| AK026918    | 2.10        |
| AK027056    | 2.46        |
| AK031258    | 2.01        |
| AK032637    | 2.14        |
| AK033438    | 2.08        |
| AK034162    | 2.16        |
| AK038473    | 3.41        |
| AK042305    | 2.39        |
| AK043222    | 2.03        |
| AK043754    | 2.41        |
| AK044953    | 2.97        |
| AK045688    | 3.16        |
| AK049553    | 2.03        |
| AK049921    | 2.23        |
| AK051335    | 2.06        |
| AK051929    | 2.23        |
| AK075427    | 3.14        |
| AK089161    | 2.13        |
| AK093780    | 2.01        |
| AK095095    | 2.46        |
| AK124067    | 2.10        |
| AK124945    | 2.16        |
| AK127444    | 2.25        |
| AK130273    | 2.33        |
| AK134798    | 2.69        |
| AK134972    | 2.93        |

| Gene Symbol       | Fold change |
|-------------------|-------------|
| AK135574          | 2.55        |
| AK138348          | 3.39        |
| AK138429          | 2.60        |
| AK142834          | 2.28        |
| AK142900          | 2.16        |
| AK143031          | 2.33        |
| AK144697          | 2.17        |
| AK148851          | 2.13        |
| AK148867          | 3.01        |
| AK156187          | 2.13        |
| AK162886          | 2.55        |
| AK164777          | 2.10        |
| AK225606          | 2.10        |
| AK294907          | 2.28        |
| AK298134          | 2.39        |
| AK298339          | 2.41        |
| AK299460          | 2.35        |
| AK300020          | 2.19        |
| AK300946          | 2.43        |
| AK310837          | 2.01        |
| A130004G11Rik     | 2.01        |
| A530047J11Rik     | 2.60        |
| A730009E18Rik     | 2.17        |
| A730011C13Rik     | 2.68        |
| A730056A06Rik     | 2.04        |
| A930009L07Rik     | 2.64        |
| A930017M01Rik     | 2.30        |
| A930034L06Rik     | 2.14        |
| BB146404          | 2.69        |
| BC004044          | 2.43        |
| BC018242          | 2.31        |
| BC055107          | 2.01        |
| C130030K03Rik     | 2.08        |
| C130068B02Rik     | 2.03        |
| C530008M17Rik     | 2.30        |
| C77713            | 2.48        |
| D11Bwg0517e       | 3.14        |
| D330040H18Rik     | 2.50        |
| D430039N05Rik     | 3.56        |
| D630004K10Rik     | 2.13        |
| E030016H06Rik     | 2.23        |
| E330009J07Rik     | 2.60        |
| E430002G05Rik     | 2.43        |
| E430016P22Rik     | 2.22        |
| EG245190          | 3.18        |
| EG665934          | 2.95        |
| ENSBTAT0000000231 | 2.45        |
| ENSMODT0000001033 | 2.04        |
| ENST00000265579   | 2.51        |
| LOC100044161      | 2.77        |

| Gene Symbol  | Fold change |
|--------------|-------------|
| LOC100044679 | 2.20        |
| LOC100044812 | 2.17        |
| LOC100045085 | 2.03        |
| LOC100045484 | 2.48        |
| LOC100045567 | 2.19        |
| LOC100046727 | 2.01        |
| LOC100046767 | 2.01        |
| LOC100047142 | 2.17        |
| LOC100047385 | 2.01        |
| LOC100047470 | 2.27        |
| LOC100047530 | 2.28        |
| LOC100047888 | 2.45        |
| LOC100048050 | 2.99        |
| LOC230628    | 2.53        |
| LOC634842    | 3.43        |
| LOC669392    | 2.95        |
| LOC674483    | 2.20        |
| LOC677282    | 2.57        |
| LOC701893    | 2.30        |
| LOC712321    | 2.14        |
| LOC776679    | 2.01        |
| NM_001007594 | 2.28        |
| NM_001035464 | 2.14        |
| NM_001102516 | 2.10        |
| NM_001106121 | 2.81        |
| NM_001106666 | 2.46        |
| NM_001107432 | 2.13        |
| NM_001108078 | 2.03        |
| NM_001108862 | 2.06        |
| NM_012893    | 2.36        |
| NM_053822    | 2.99        |
| NM_214347    | 2.16        |
| XM_001053015 | 2.28        |
| XM_001053312 | 2.33        |
| XM_001054111 | 2.22        |
| XM_001058628 | 2.83        |
| XM_001067870 | 2.01        |
| XM_001073457 | 3.23        |
| XM_001076955 | 2.43        |
| XM_001080417 | 2.13        |
| XM_001082676 | 2.99        |
| XM_001088438 | 2.04        |
| XM_001088649 | 2.39        |
| XM_001088713 | 2.17        |
| XM_001089160 | 2.45        |
| XM_001091361 | 2.13        |
| XM_001095563 | 2.04        |
| XM_001098094 | 2.46        |
| XM_001099341 | 2.11        |
| XM_001099442 | 2.11        |

| Gene Symbol   | Fold change |
|---------------|-------------|
| XM_001100822  | 2.08        |
| XM_001101025  | 2.08        |
| XM_001107526  | 2.01        |
| XM_001107897  | 2.06        |
| XM_001108317  | 2.03        |
| XM_001109727  | 2.03        |
| XM_001110003  | 2.04        |
| XM_001110109  | 2.04        |
| XM_001113480  | 2.79        |
| XM_001113794  | 2.89        |
| XM_001145930  | 2.43        |
| XM_001150473  | 2.17        |
| XM_001162335  | 2.11        |
| XM_001164572  | 2.10        |
| XM_001724386  | 2.57        |
| XM_001925065  | 2.11        |
| XM_001926010  | 2.08        |
| XM_215451     | 2.68        |
| XM_235962     | 2.33        |
| XM_241632     | 2.20        |
| XM_243912     | 2.04        |
| XM_516488     | 2.55        |
| XM_516592     | 2.57        |
| XM_521649     | 2.19        |
| XM_588692     | 2.01        |
| XM_843577     | 2.22        |
| XM_848960     | 2.95        |
| XM_861214     | 2.62        |
| XR_010828     | 2.14        |
| XR_012731     | 2.07        |
| 0610030E20Rik | 2.22        |
| 1110017I16Rik | 2.71        |
| 1110032A04Rik | 3.10        |
| 1700001C02Rik | 2.27        |
| 1700027A23Rik | 2.20        |
| 1810041L15Rik | 3.01        |
| 2210023G05Rik | 2.19        |
| 2210411A11Rik | 2.77        |
| 2310014D11Rik | 2.16        |
| 2600009P04Rik | 2.33        |
| 2610017I09Rik | 3.61        |
| 2610204M08Rik | 2.17        |
| 2610305D13Rik | 2.64        |
| 2700046A07Rik | 2.10        |
| 2810489J07Rik | 2.30        |
| 2900052N01Rik | 2.22        |
| 3110006E14Rik | 2.57        |
| 4631426J05Rik | 2.19        |
| 4833409A17Rik | 2.01        |
| 4921530D09Rik | 2.03        |

| Gene Symbol   | Fold change |
|---------------|-------------|
| 4930488B01Rik | 3.05        |
| 4930524O07Rik | 2.60        |
| 4932441J04Rik | 3.12        |
| 4933413A10Rik | 2.85        |
| 5031426D15Rik | 2.28        |
| 5330422M15Rik | 3.03        |
| 5430407P10Rik | 2.99        |
| 6230424C14Rik | 2.48        |
| 6330514A18Rik | 2.30        |
| 6430550H21Rik | 2.43        |
| 8030425K09Rik | 2.07        |
| 8430420F16Rik | 2.41        |
| 8430436O14Rik | 2.08        |
| 9030425E11Rik | 2.20        |
| 9130005N14Rik | 2.08        |
| 9130230N09Rik | 2.19        |
| 9430028L06Rik | 2.43        |
| 9530086O07Rik | 2.39        |
| 9630041G16Rik | 2.85        |
| 9930013L23Rik | 2.11        |
